# Supplementary material for: Bio-based carbonaceous composite materials from epoxidised linseed oil, bio-derived curing agent and starch with controllable functionality
Source: Royal Society of Chemistry journal article supplement (doi:10.1039/c7ra02837g), 2017-01-01
Supplement: c7ra02837g1.pdf [file c7ra02837g1.pdf]

Supplementary Information

**Bio-based carbonaceous composite materials from epoxidised linseed oil, bio-derived curing agent  
and starch with controllable functionality**

Curing study of the reactive mixtures using FT-IR

The addition of Starbon® scarcely altered the spectra of both reactive mixtures and cured films; however the ester band at  $1736\text{ cm}^{-1}$  of the cured control sample showed slightly higher intensity than ones with fillers, suggesting higher degree of crosslinking as confirmed by DSC study.

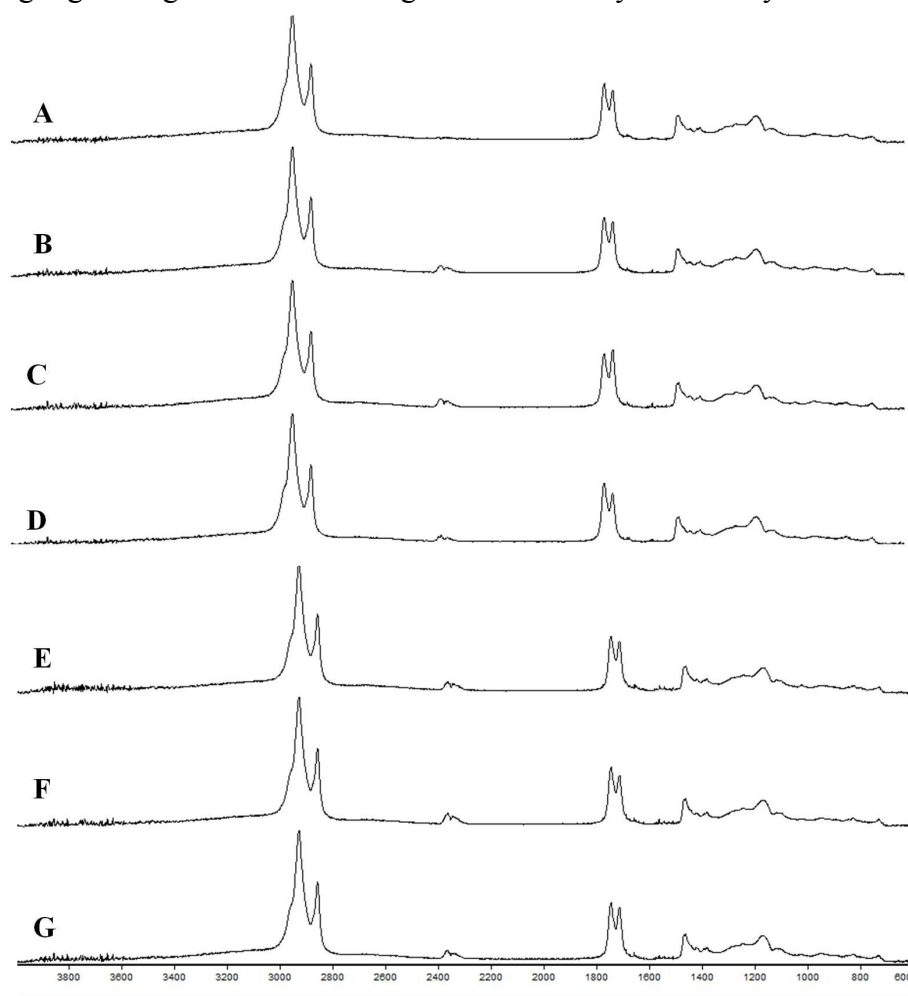

**Fig. S1** FT-IR spectra of reactive mixtures (before curing) A. control, B. 5% S300, C. 10% S300, D. 20% S300, E. 5% S800, F. 10% S800, G. 20% S800.

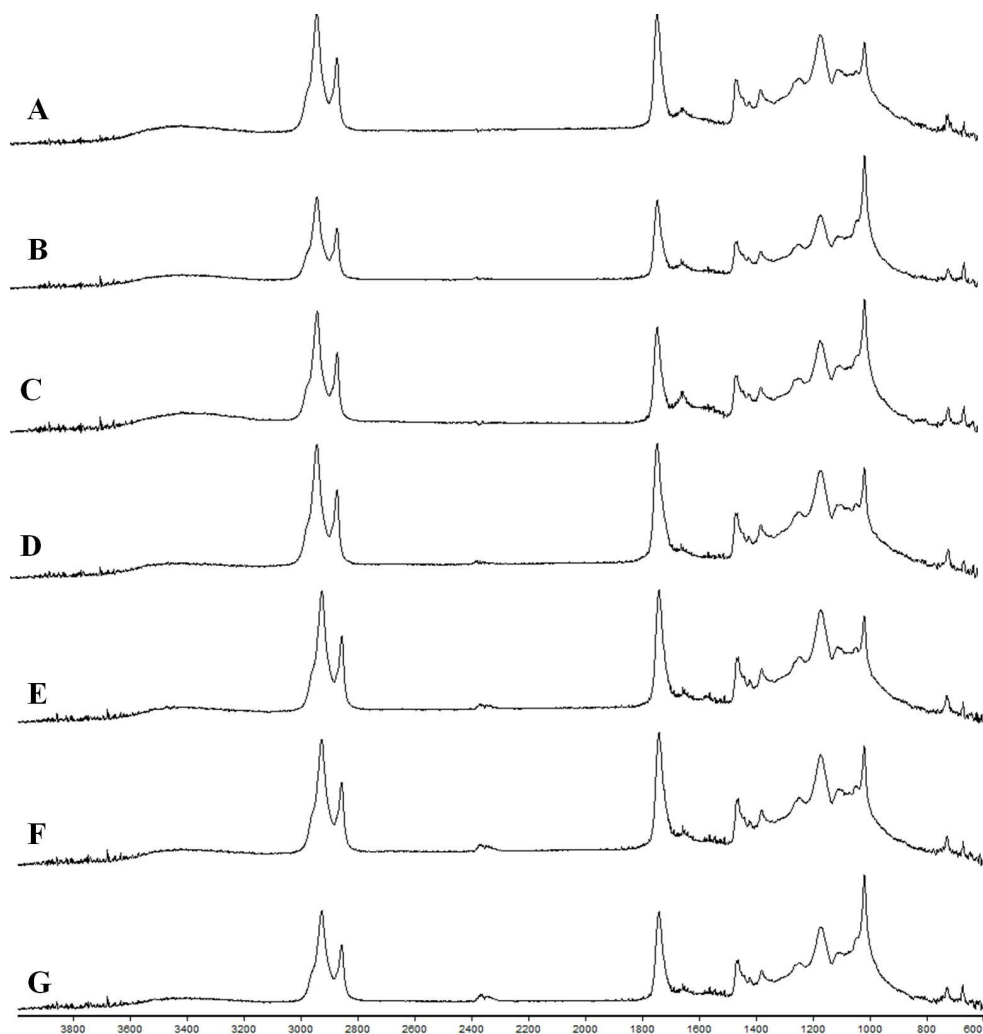

**Fig. S2** FT-IR spectra of thermoset films (after curing) A. control, B. 5% S300, C. 10% S300, D. 20% S300, E. 5% S800, F. 10% S800, G. 20% S800.

#### Thermal analysis of the reactive mixtures

Table S1 summarises the heat of reaction (and heat of reaction normalised, excluding the filler mass), the peak and onset temperatures of the studied reactive mixtures and the glass transitions ( $T_g$ ) of the cured materials.

**Table S1** Summary of MDSC results of reactive mixtures

| Formulation | Heat of reaction <sup>a</sup><br>(J/g) | Normalised heat of reaction (J/g) | Onset temperature <sup>a</sup> (°C) | Peak temperature <sup>a</sup> (°C) | T <sub>g</sub> <sup>b</sup> (°C) |
|-------------|----------------------------------------|-----------------------------------|-------------------------------------|------------------------------------|----------------------------------|
| Control     | 151                                    | 151                               | 100.6                               | 139.8                              | -13.7                            |
| 5%S300      | 152                                    | 160                               | 104.3                               | 142.9                              | -14.8                            |
| 10%S300     | 111                                    | 123                               | 114.9                               | 152.3                              | -15.7                            |
| 20%S300     | 115                                    | 144                               | 117.4                               | 166.5                              | -16.4                            |
| 5%S800      | 134                                    | 141                               | 108.1                               | 144.5                              | -13.4                            |
| 10%S800     | 149                                    | 166                               | 101.9                               | 140.7                              | -13.7                            |
| 20%S800     | 122                                    | 153                               | 104.4                               | 143.5                              | -11.0                            |

<sup>a</sup>Non-reversing heat flow (1<sup>st</sup> heating cycle); <sup>b</sup>Reversing heat flow (2<sup>nd</sup> heating cycle).

The uniform distribution of Starbon® particles results in single curing transition with no evident sign of post-cure in second heating cycle.

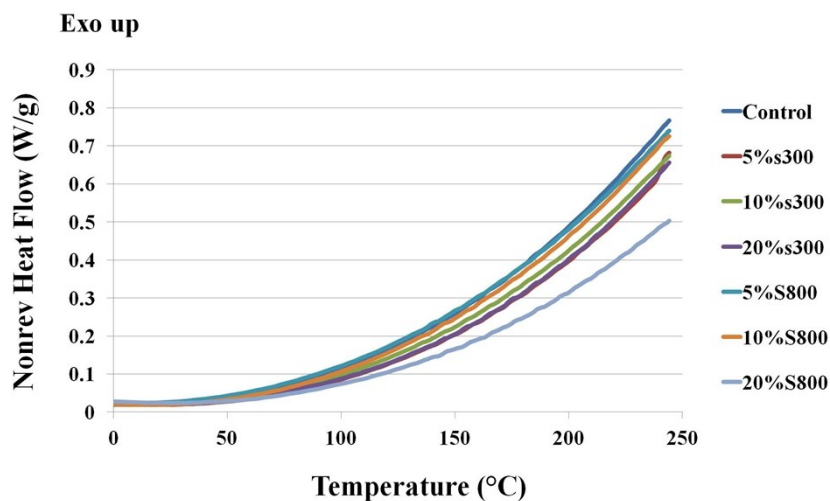

**Fig. S3** DSC thermograms of the second heating cycle of formulations comprised of ELO, Pripol, DMAP and different amounts of S300 and S800 (5, 10 and 20%wt.).

## Thermal stability of the composites

Table S2 summarises data from TGA measurement of the thermoset composites including the temperature when the original sample weight decreased by 5% ( $T_{5\%}$ ) and by 50% ( $T_{50\%}$ ), residue weight at 550 °C and the maximum temperature of the two-stage thermal decomposition ( $T_{MAX 1}$  and  $T_{MAX 2}$ ).

**Table S2** TGA and dTG results summary of thermoset composites.

| Formulation | $T_{5\%}$ (°C) | $T_{50\%}$ (°C) | Residual weight at 550 °C (%) | $T_{MAX 1}$ (°C) | $T_{MAX 2}$ (°C) |
|-------------|----------------|-----------------|-------------------------------|------------------|------------------|
| Control     | 362            | 422             | 0.9                           | 402              | 456              |
| 5%S300      | 352            | 417             | 4.1                           | 407              | 455              |
| 10%S300     | 353            | 429             | 7.4                           | 402              | 455              |
| 20%S300     | 348            | 431             | 11.7                          | 404              | 456              |
| 5%S800      | 365            | 426             | 4.4                           | 402              | 456              |
| 10%S800     | 364            | 431             | 12.2                          | 405              | 455              |
| 20%S800     | 365            | 444             | 21.8                          | 403              | 447              |

## Morphological study of the composites

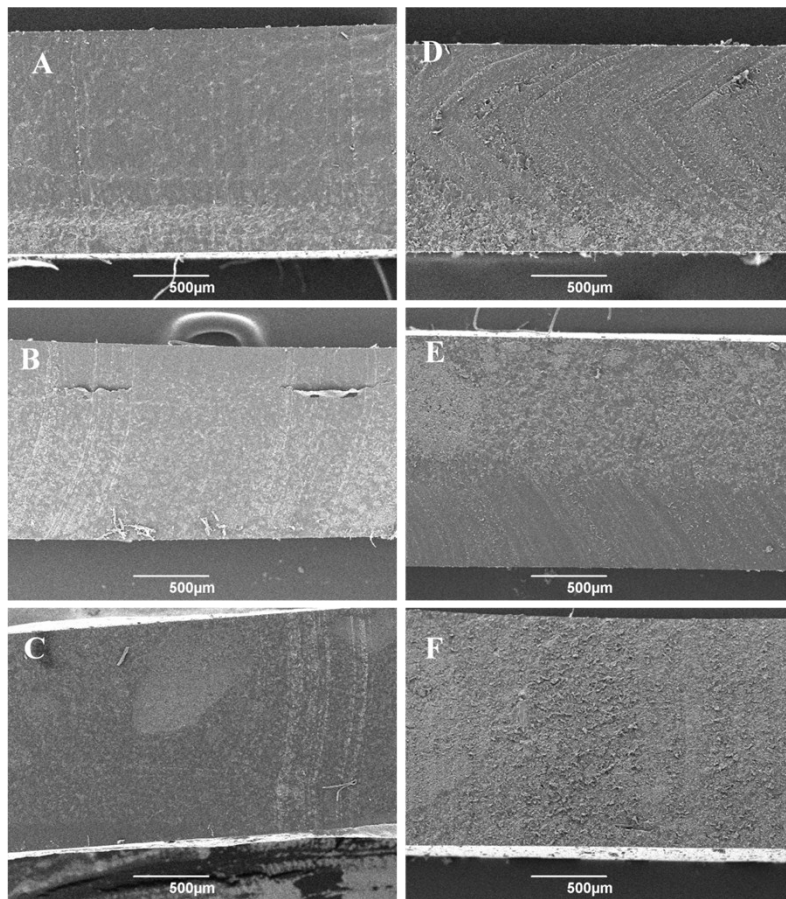

**Fig. S4** Scanning electron micrographs of the cross-section of thermoset films with different loading of S300 (A, B, C) and S800 (D, E, F) at 5%, 10% and 20% respectively.

Dynamic mechanical analysis of the composites

**Table S3** Storage modulus and  $T_g$  of the composites for S300

| Temperature (°C) | Storage modulus (MPa) |        |         |         |
|------------------|-----------------------|--------|---------|---------|
|                  | Control               | 5%S300 | 10%S300 | 20%S300 |
| -120             | 5982                  | 4247   | 3628    | 4490    |
| -60              | 3833                  | 3014   | 2459    | 3574    |
| -30              | 3123                  | 2378   | 2045    | 3049    |
| -15              | 1836                  | 1580   | 1338    | 1866    |
| $T_g^*$ (°C)     | -26.0                 | -21.2  | -25.0   | -23.5   |

\*: Calculated on the onset of the storage modulus drop.

**Table S4** Storage modulus and  $T_g$  of the composites for S800

| Temperature (°C) | Storage modulus (MPa) |        |         |         |
|------------------|-----------------------|--------|---------|---------|
|                  | Control               | 5%S800 | 10%S800 | 20%S800 |
| -120             | 5982                  | 7040   | 3504    | 5217    |
| -60              | 3833                  | 4724   | 2376    | 3856    |
| -20              | 2432                  | 2980   | 1593    | 2763    |
| -10              | 1003                  | 1160   | 816     | 1270    |
| $T_g^*$ (°C)     | -26.0                 | -24.9  | -20.7   | -21.9   |

\*: Calculated on the onset of the storage modulus drop.

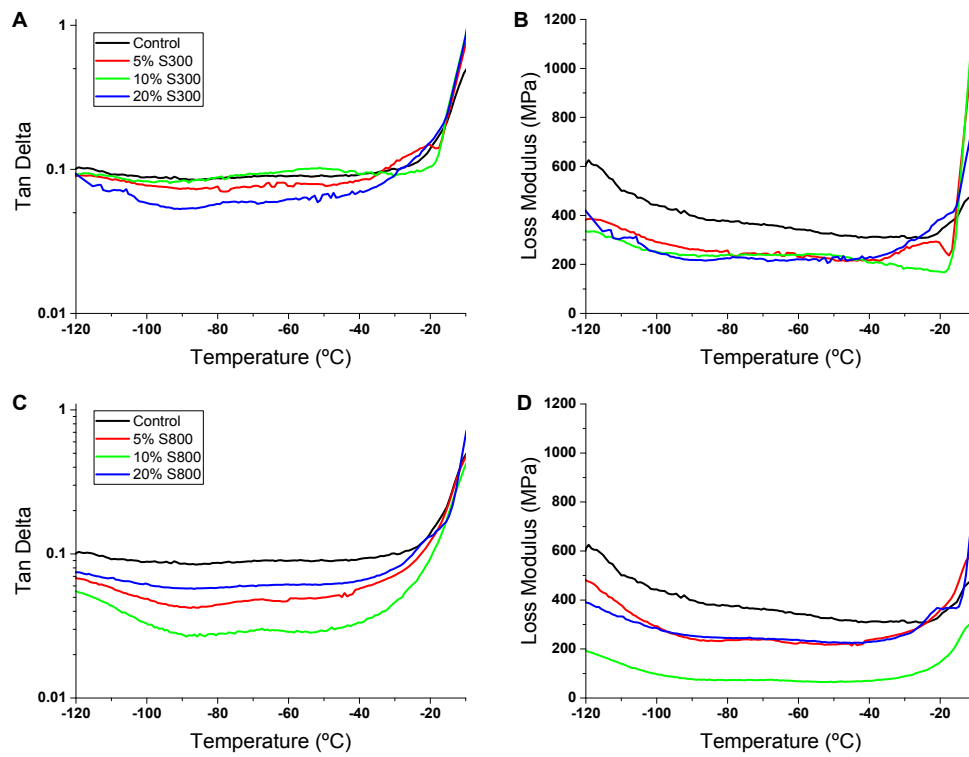

**Fig. S5** Tan  $\delta$  and loss modulus of the composites from DMA analysis - S300 (A and B) and S800 (C and D).
